# Supplementary material for: Activation of a Chimeric Rpb5/RpoH Subunit Using Library Selection
Source: PLoS One. 2014 Jan 29;9(1):e87485. doi: 10.1371/journal.pone.0087485 (PMC3906176; doi:10.1371/journal.pone.0087485)
Supplement: Table S1 — Oligonucleotides used in this study. (DOCX) [file pone.0087485.s001.docx]

**Supplementary Data**

**Table S1:** Oligonucleotides used for cloning, restriction sites are underlined.

| | primer | oligonucleotide Sequence (5’🡪3’) | | --- | --- | | 5’rpb5_EcoRI | GCTAAGACAGAATTCATGGACCAAGAAAATGAAAGAAACATCTCAAGA | | 3’rpb5_rpoH | ATGTTCAGGTACTAATTCGTGGTGAGTAATA | | 5’rpoH_rpb5 | TATTACTCACCACGAATTAGTACCTGAACAT | | 3’rpoH_NotI | CCCCCGGCGGCCGCCTAGTCTTCAACAACAACCCTATAGTAG | | SimR-Prom1-F | GGGCATTTCATCATTTTTATGAA | | TK0914TK1431Pr-R | CTCAACAAGCTCTTCAAAGTTCATTCATACCACCTCATTTCGGTAAT | | TK0914-F | ATGAACTTTGAAGAGCTTGTTGAGAAGGTAGC | | TK0914-R | CTAACGTCCAAGCTCCTTATGGGC | | TK0914TK1431T-F | CATAAGGAGCTTGGACGTTAGTTTCTTCTCCCTTTTCTCTTG | | SimR-Term2-R | CGAAGGCTTAAACTTCTGTTTCG | | Hup-ERV-F | GGACTTGATATCCCCAGGTCGC | | Fus-Hup-tkR-R 5´ | AAATGATGAAATGCCCTTAGTCTCTAGTATATAAGCTTTACTCAACC | | Fus-Strep-H-F | CACCCACAGTTCGAGAAGGCGGGGAAAAAGGAAT | | H-dwn-ERV-R | CTCAACGATATCCTTATCTCTCTCC | | Fus-SimR-pr-R | CTCAACCTTAATAAACATTATTAAAAACGAAGGCTTAAACTTC | | H-Prom-F | TTTTTAATAATGTTTATTAAGGTTGAGTAAAGC | | Fus-His-HPr-R | GTGATGGTGATGGTGATGCACGGAGAATTGCCCC | | Fus-His-Strep-F | CATCACCATCACCATCACAGCGCATGGTCTCACC | | pf1565-Mut-E62K-F | GAAATTAAAAGGAAAAGTCCAACT | | pf1565-Mut-E62K-R | GATAACATCTCCCGGCTTAG | | Rpb5-N-Domäne F | ATGGACCAAGAAAATGAAAGA | | Rpb5-N-Domäne R | TTCGTGGTGAGTAATATTAACCA | |
| --- | --- | --- | --- | --- | --- | --- | --- | --- | --- | --- | --- | --- | --- | --- | --- | --- | --- | --- | --- | --- | --- | --- | --- | --- | --- | --- | --- | --- | --- | --- | --- | --- | --- | --- | --- | --- | --- | --- | --- | --- | --- | --- | --- | --- | --- | --- |
